# Supplementary material for: A Raf-like protein kinase BHP mediates blue light-dependent stomatal opening
Source: PubMed Central journal article supplement (PMC5372365; doi:10.1038/srep45586), 2017-03-30
Supplement: srep45586-s1.pdf [file srep45586-s1.pdf]

# Supplementary Information

## A Raf-like protein kinase BHP mediates blue light-dependent stomatal opening

Maki Hayashi<sup>1</sup>, Shin-ichiro Inoue<sup>1</sup>, Yoshihisa Ueno<sup>1,3</sup>, Toshinori Kinoshita<sup>1,2,\*</sup>

<sup>1</sup>Division of Biological Science, Graduate School of Science, Nagoya University, Chikusa, Nagoya 464-8602, Japan

<sup>2</sup>Institute of Transformative Bio-Molecules (WPI-ITbM), Nagoya University, Chikusa, Nagoya 464-8602, Japan

<sup>3</sup>Current address: Department of Agriculture, Ryukoku University, Seta Oe-cho, Otsu, Shiga 520-2194, Japan

\*Corresponding author: Toshinori Kinoshita

Institute of Transformative Bio-Molecules (WPI-ITbM), Nagoya University, Chikusa, Nagoya 464-8602, Japan

Tel/ Fax: +81-52-789-4778

E-mail: kinoshita@bio.nagoya-u.ac.jp

**a**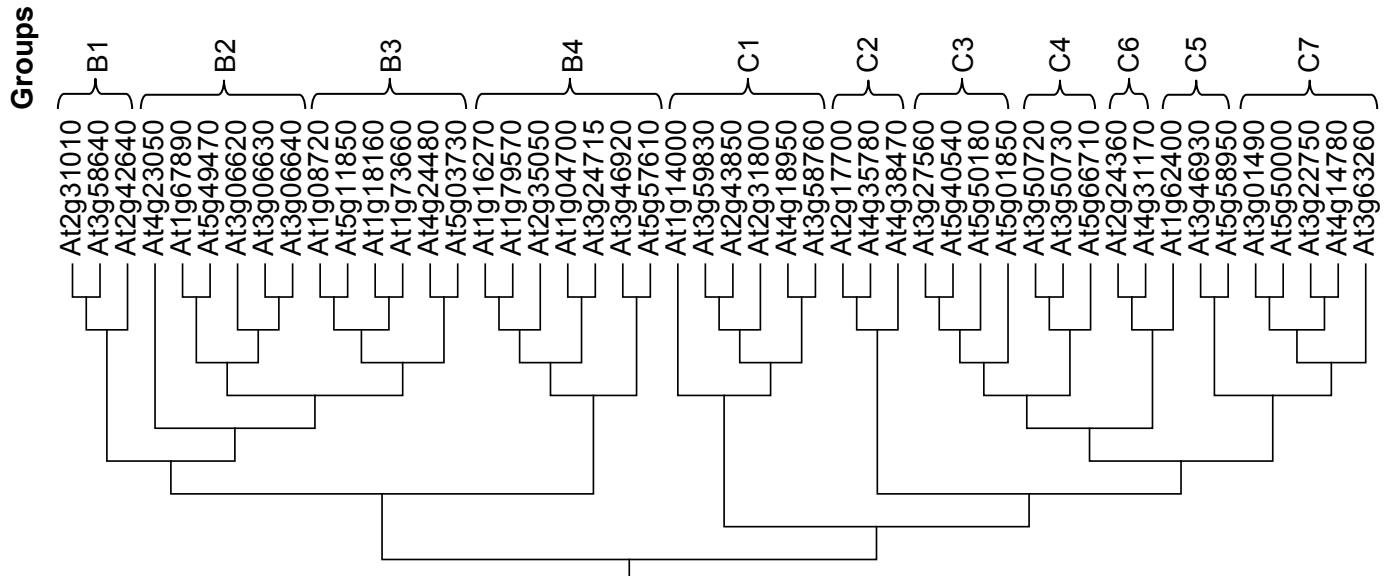**b**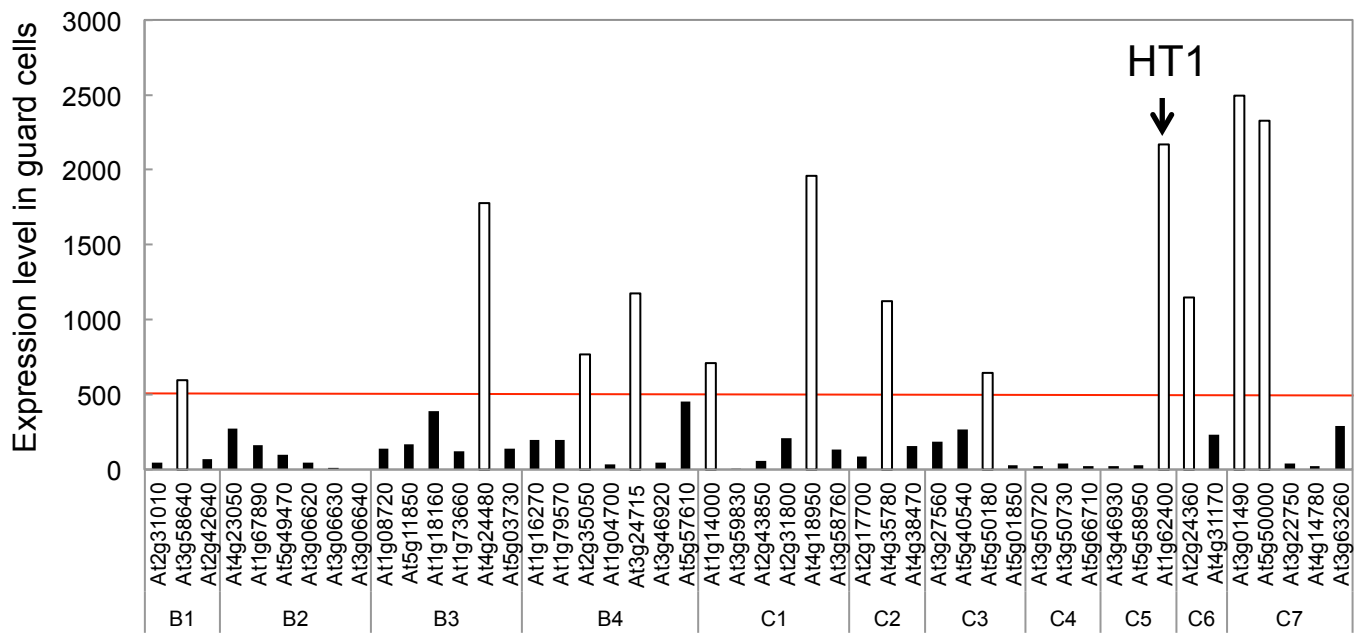

**Supplementary Figure 1. Expression levels of Arabidopsis Raf-like kinase genes in guard cells.**

(a) Phylogenetic relationship in the Arabidopsis Raf-like kinases. The tree was similarly created as described in Fig. 4b. Amino acid sequences of the kinase domains from the members were used. The Raf-like kinases subfamily was classified as B1-B4 and C1-C7 groups, as reported previously<sup>1</sup>. (b) Gene expression levels of Raf-like kinases in guard cells. Data of the expression levels in guard cells were obtained from a public microarray database eFP browser ([http://bar.utoronto.ca/efp/cgi-bin/efpWeb.cgi?dataSource=Guard\\_Cell](http://bar.utoronto.ca/efp/cgi-bin/efpWeb.cgi?dataSource=Guard_Cell)). White columns indicate the high expression genes in guard cells over 500 in the database.

## Groups

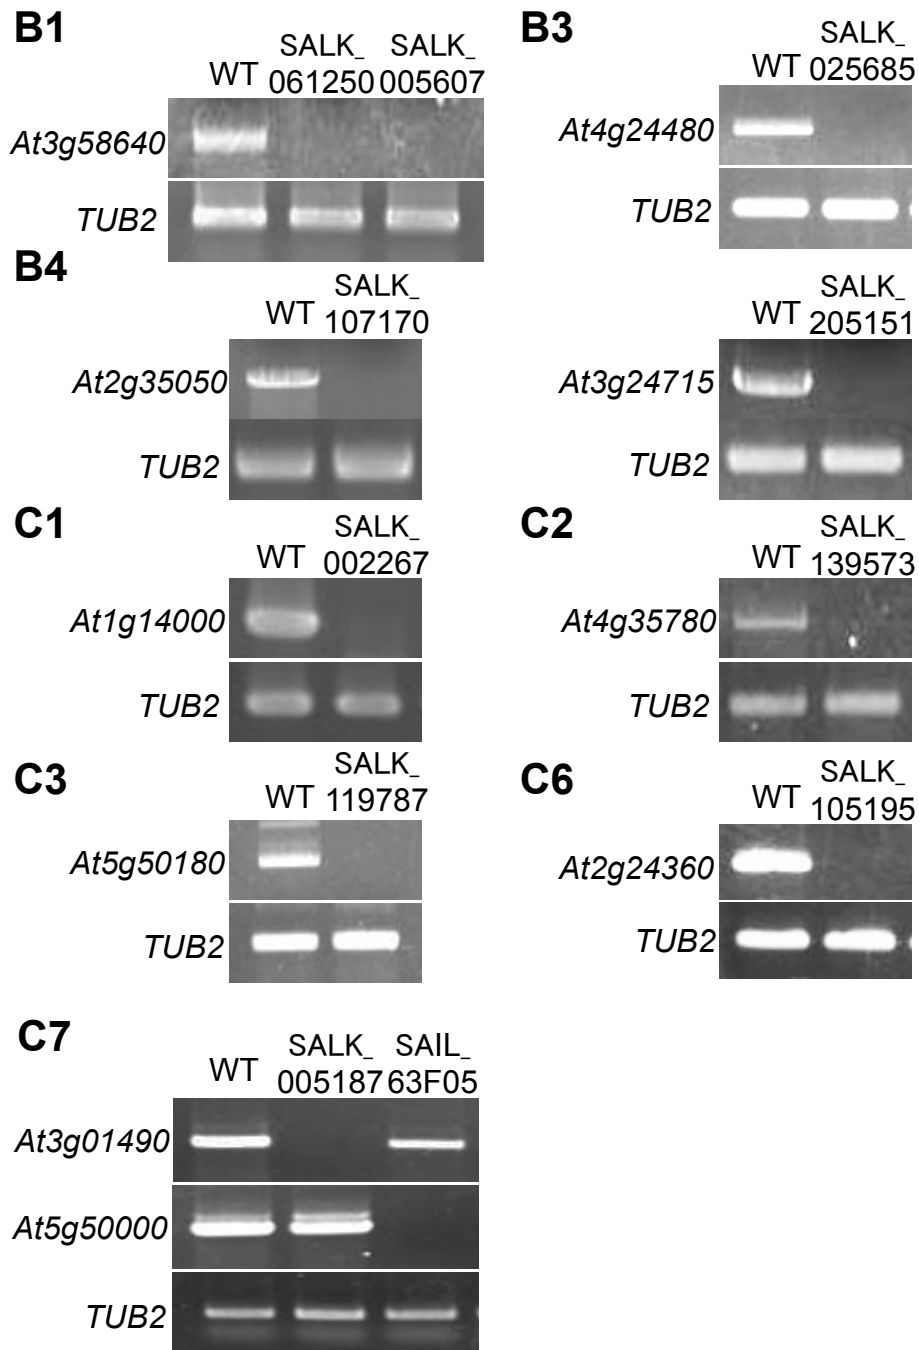

### Supplementary Figure 2. Confirmation of gene knockouts in the T-DNA insertion mutants in this study.

RT-PCR was performed using total RNAs from the rosette leaves in wild-type (WT) and T-DNA insertion mutants. All genes were amplified by PCR using the specific primer sets (see Supplementary Table 2). *TUB2* was amplified as an internal control.

## Groups

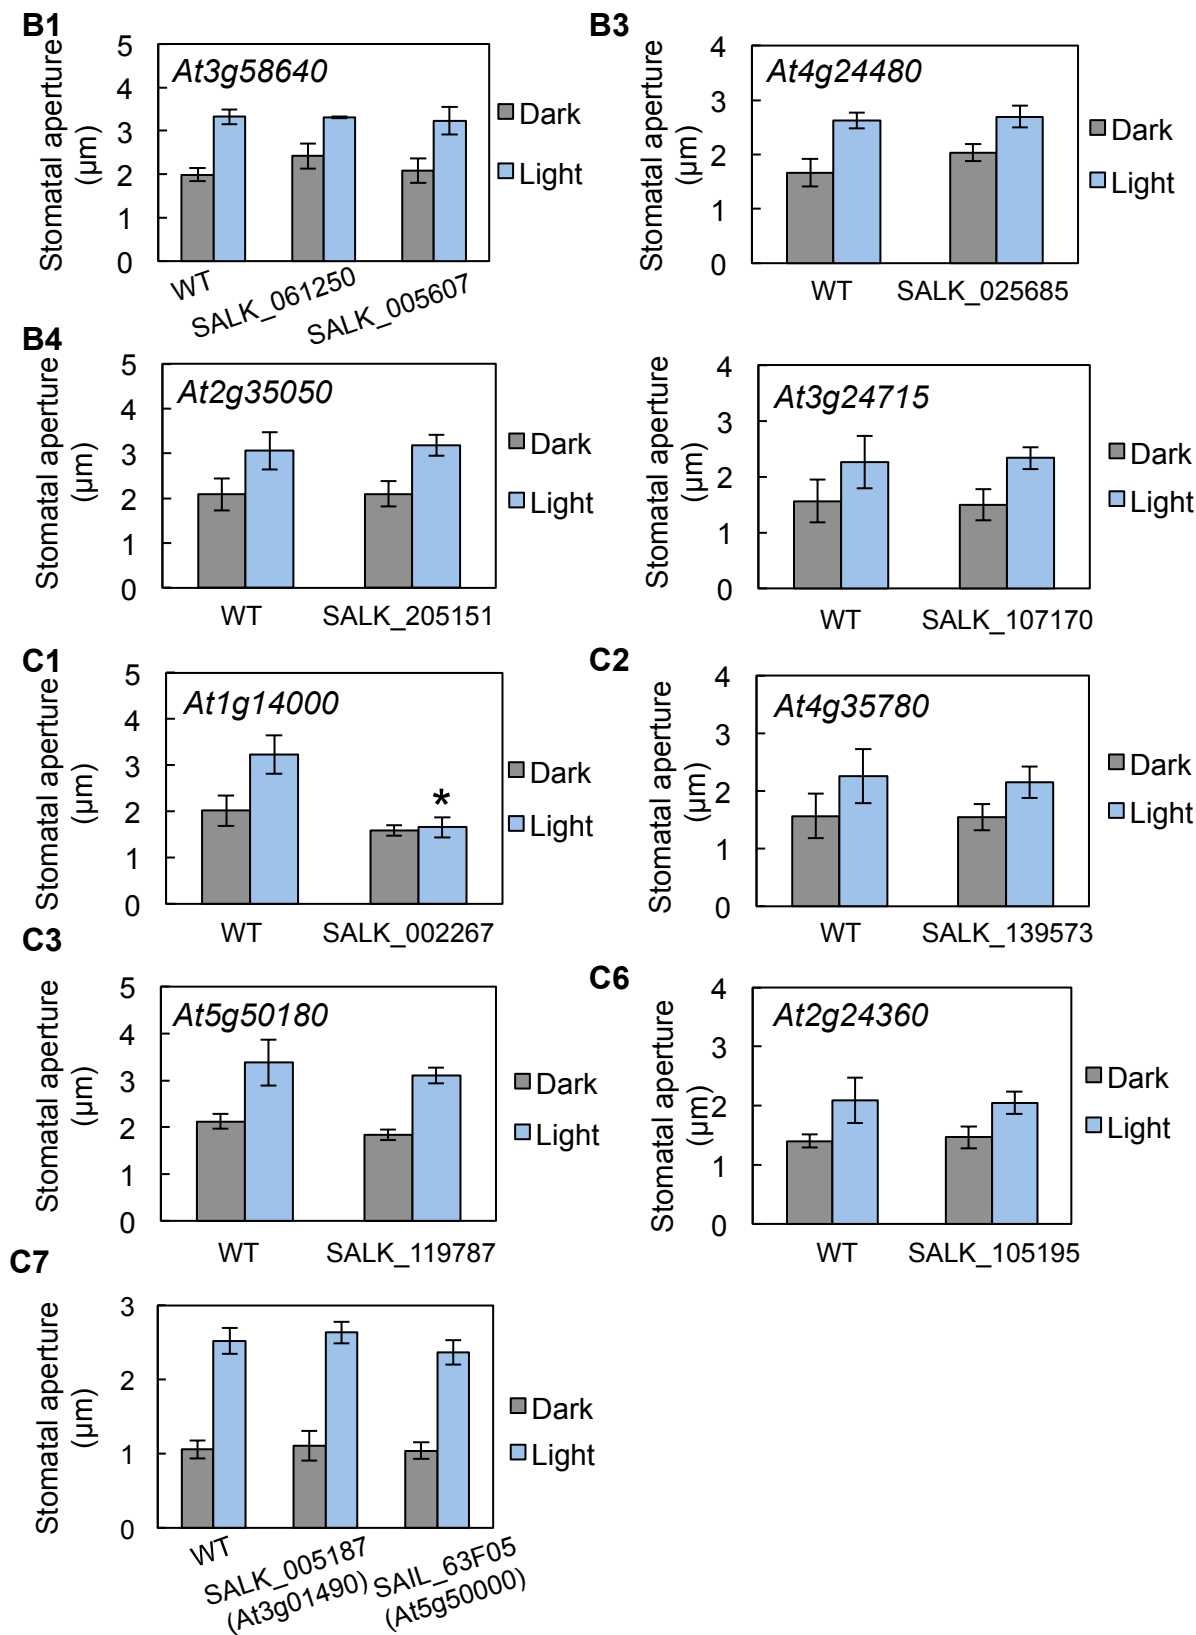

### Supplementary Figure 3. Measurements of the blue light-dependent stomatal opening in the T-DNA insertion mutants.

Values represent means±s.d. ( $n=3$ ); measurement of 30 stomata in each experiment. \* indicates values that statistically differ from WT blue light sample (Student's  $t$  test;  $*p<0.01$ ).

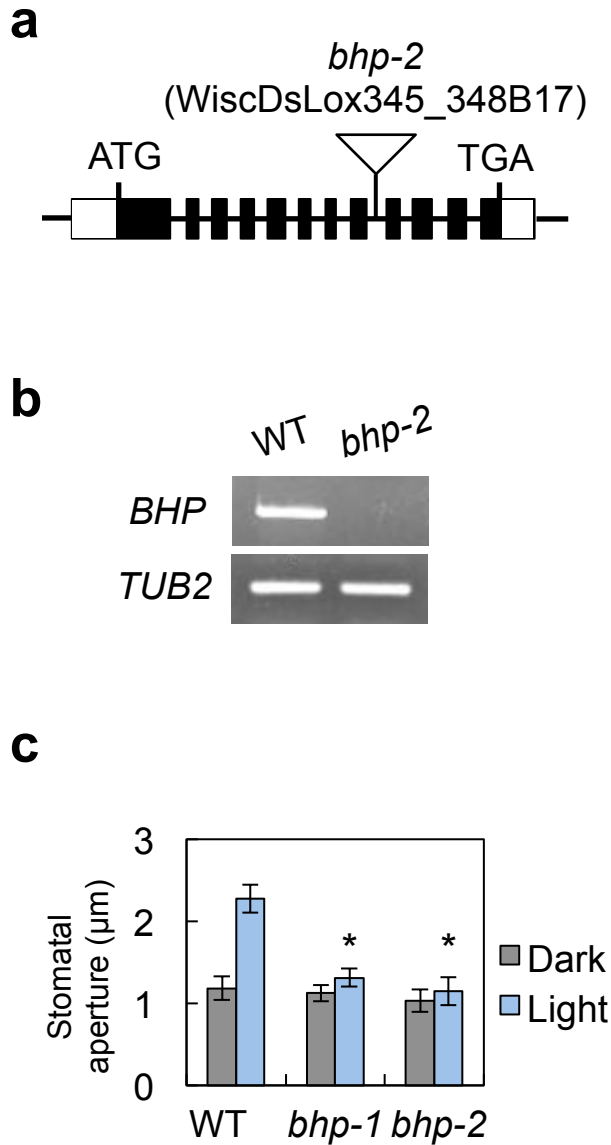

**Supplementary Figure 4. Blue light-dependent stomatal opening in T-DNA insertion alleles of *BHP*.**

(a) Schematic representation of the *BHP* gene (*At4g18950*) and position of the T-DNA insertion in the *bhp-2* mutant. Boxes and lines indicate exons and introns, respectively. (b) Knockout of the *BHP* gene in the *bhp-2* mutant. (c) Blue light-dependent stomatal opening in leaves from WT, *bhp-1*, and *bhp-2*. The experiment was performed as described in Fig. 2d. Values represent means  $\pm$  s.d. ( $n=4$ ); measurement of 30 stomata in each experiment. \* indicates values that statistically differ from the corresponding WT (Student's *t* test;  $*p<0.01$ ).

**a**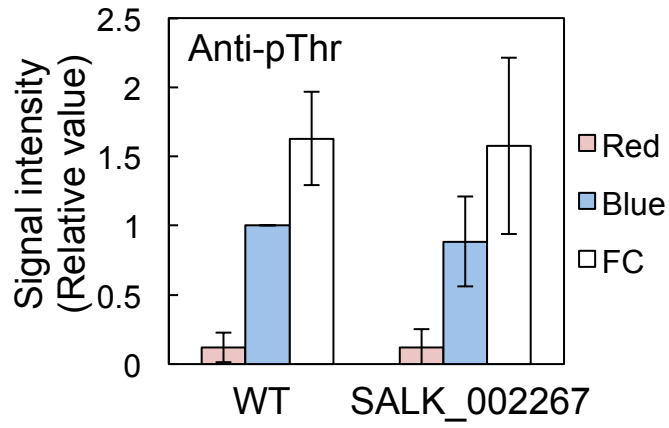**b**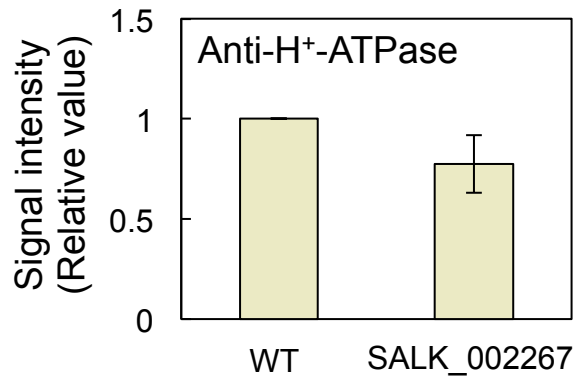**c**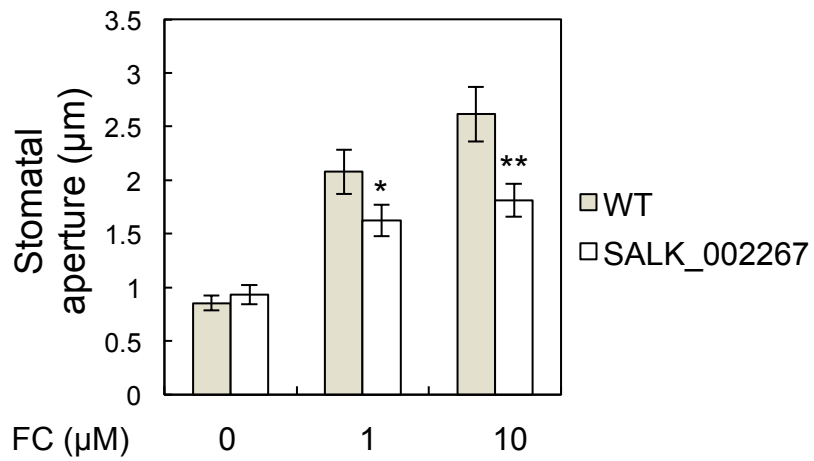

**Supplementary Figure 5. Immunohistochemical detection of guard cell H<sup>+</sup>-ATPase and fusicoccin (FC) induced-stomatal opening in the *At1g14000* knockout mutant.**

(a) Phosphorylation of the guard cell H<sup>+</sup>-ATPase in SALK\_002267 in response to blue light and fusicoccin (FC). The immunohistochemical experiments using anti-pThr antibody were performed and are shown in Fig. 2h. Values represent means±s.d. ( $n=3$ ); measurement of 30 stomata in each experiment. (b) Immunohistochemical detection of the amount of guard cell H<sup>+</sup>-ATPase in WT and SALK\_002267 using anti-H<sup>+</sup>-ATPase antibody. The relative signal intensity was expressed as the ratio of the signal intensity from the SALK\_002267 mutant to that from WT. Values indicate means ±s.d. ( $n=3$ ), and measurements of 30 stomata in each experiment. (c) Stomatal opening in response to FC in WT and SALK\_002267 epidermis. Epidermal fragments from dark-adapted plants were incubated in reaction buffer 2 (see Methods) containing FC at the indicated concentrations for 3 h in the dark. Data represent means±s.d. ( $n=4$ ). Thirty stomata were measured in each experiment. \* and \*\* indicate values that statistically differ from the corresponding WT (Student's *t* test; \*\* $p<0.01$ , \* $p<0.05$ ).

**a**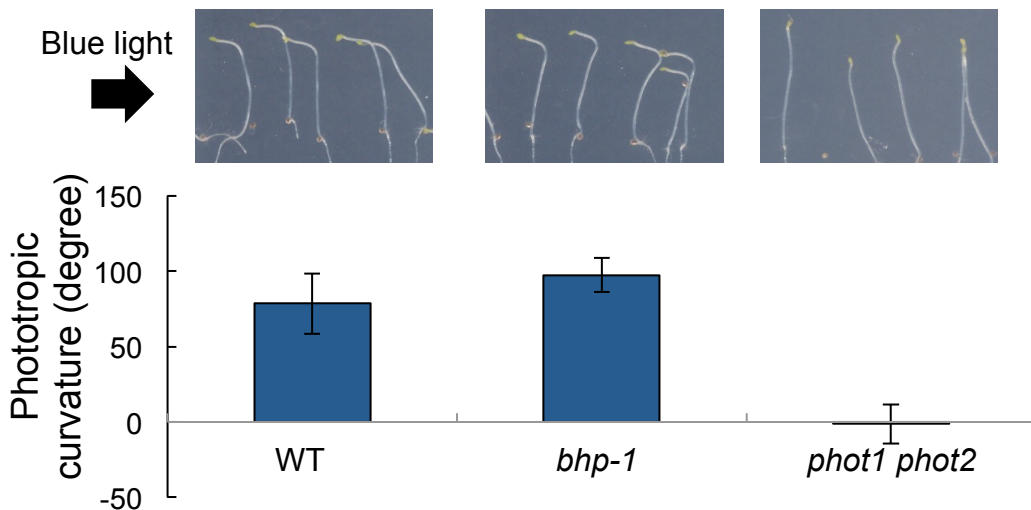**b**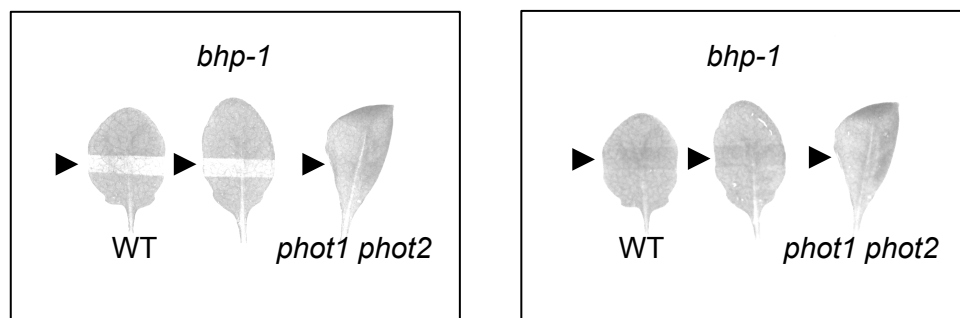**c**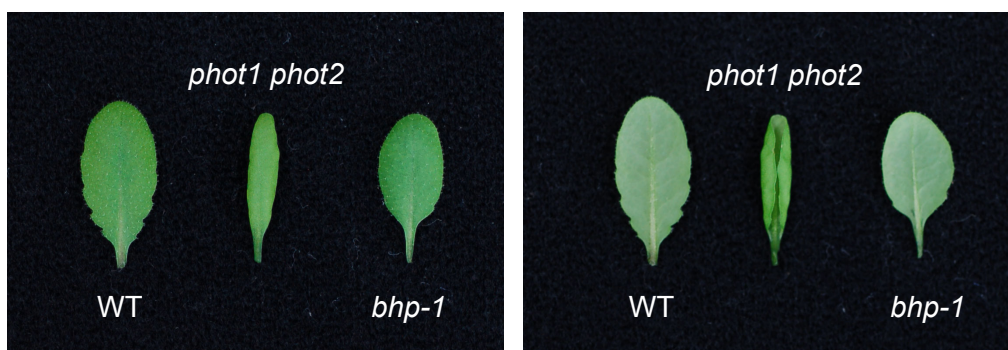

### Supplementary Figure 6. Phot-mediated blue light responses in *bhp-1* mutant.

(a) Phototropism in WT, *bhp-1*, and *phot1-5 phot2-1* (*phot1 phot2*). Etiolated seedlings were irradiated with unilateral blue light ( $0.5 \mu\text{mol m}^{-2} \text{s}^{-1}$ ) for 14 h. Values represent means $\pm$ s.d. ( $n=18-19$ ). (b) Slit band assays for the chloroplast movement in WT, *bhp-1*, and *phot1 phot2*. Left and right panels indicate the chloroplast avoidance and accumulation responses, respectively. Detached leaves were irradiated with blue light at  $100 \mu\text{mol m}^{-2} \text{s}^{-1}$  or  $5 \mu\text{mol m}^{-2} \text{s}^{-1}$  for 30 min through a slit to induce the avoidance and accumulation responses, respectively. Arrowheads indicate the irradiated areas. (c) Leaf flattening. Rosette leaves were detached from 5-week-old plants, and photos were taken from the adaxial (left panel) and abaxial (right panel) sides.



**a**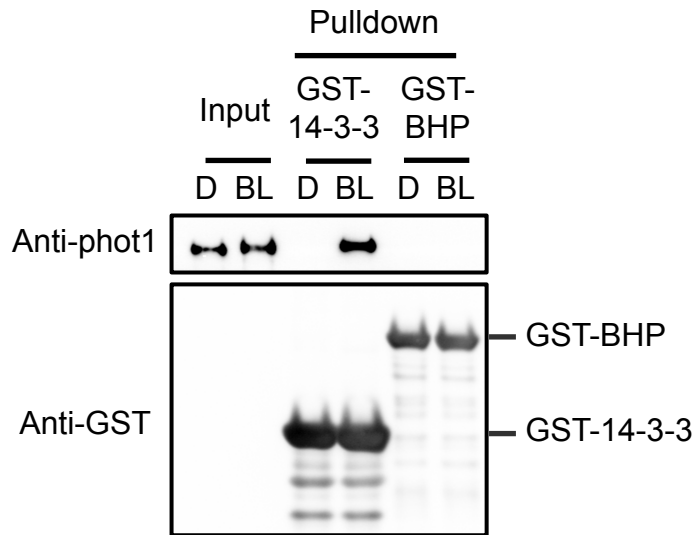**b**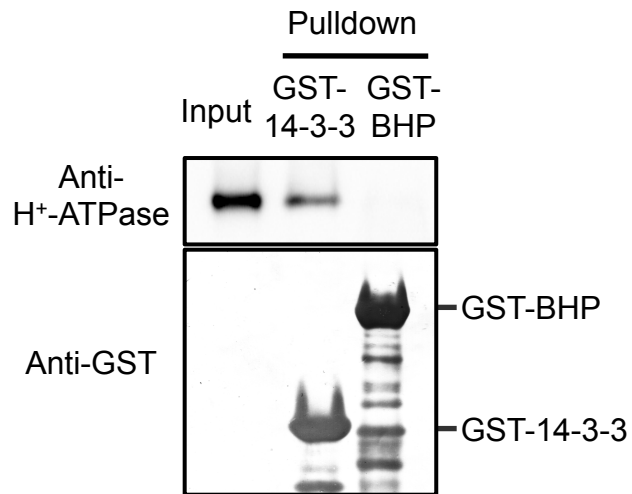**c**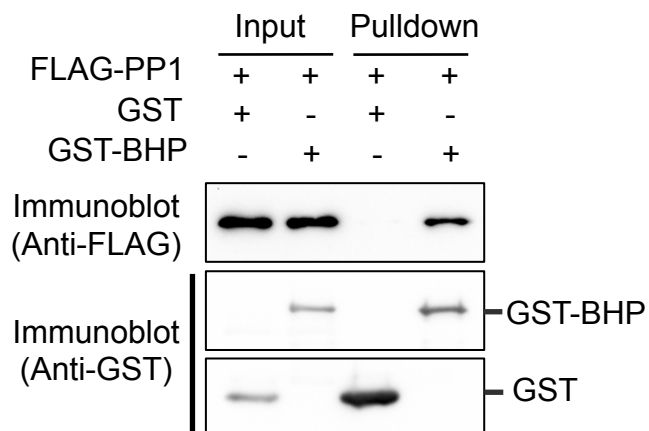

**Supplementary Figure 7. *In vitro* pull-down assays for interaction of BHP with phot1, H<sup>+</sup>-ATPase, and PP1.**

**(a,b)** The recombinant GST-14-3-3 protein or GST-BHP was purified from *E. coli* cells using glutathione-Sepharose 4B beads, and the proteins were reacted with microsomal proteins from Arabidopsis etiolated seedlings. The boundary matrices were subjected to SDS-PAGE and then immunoblot using anti-GST, anti-phot1, and anti-H<sup>+</sup>-ATPase antibodies. **(a)** Pull-down of assay of phot1 and BHP. **(b)** Pull-down of assay of H<sup>+</sup>-ATPase and BHP. The GST-14-3-3 was used as a positive control for the binding to phot1 and the H<sup>+</sup>-ATPase. **(c)** *In vitro* pull-down assay for interaction of BHP with PP1. Both proteins were expressed in *E. coli* and used. Extract from *E. coli* cells expressing GST or GST-BHP was mixed with that expressing FLAG-PP1 and reacted with glutathione-Sepharose 4B beads. Proteins on the beads were subjected to SDS-PAGE and then immunoblotting using anti-GST and anti-FLAG antibodies.

**a**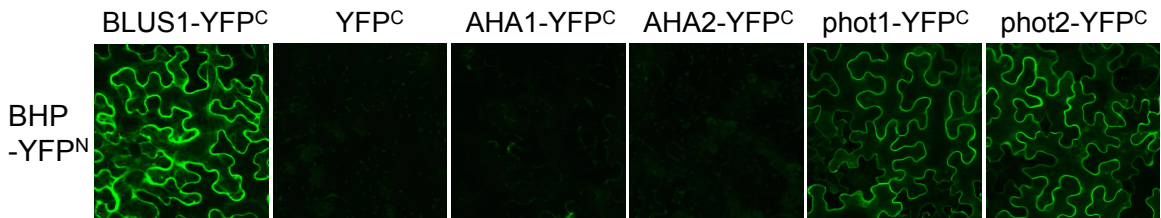**b**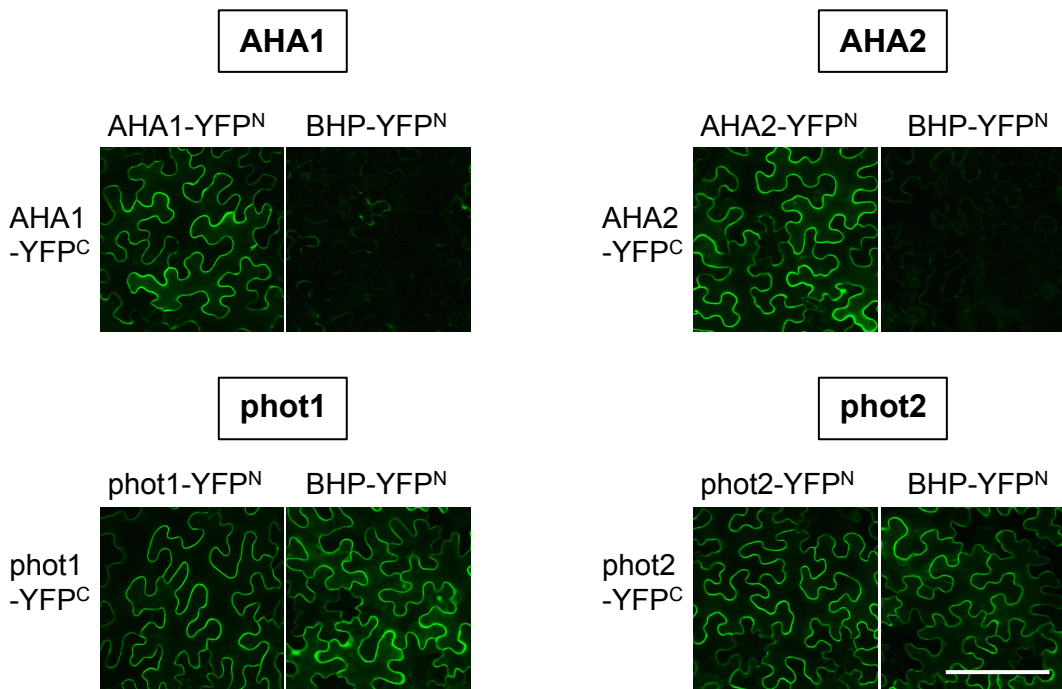

**Supplementary Figure 8. *In vivo* interactions of BHP with signaling components in blue light-dependent stomatal opening by BiFC assay.**

(a) Fluorescence images of the interactions between BHP and BLUS1, AHA1, AHA2, phot1, and phot2 in BiFC assays. Experiments were performed as shown in Fig. 5b. For negative control, the C-terminal half of YFP (YFPC) only was co-expressed with BHP-YFPN. Scale bar is 150  $\mu$ m. (b) Comparison of BHP-H<sup>+</sup>-ATPase or -phototropin interactions with the positive interaction controls in BiFC assays. Because H<sup>+</sup>-ATPase and phototropins form multimer complexes<sup>2,3</sup>, co-expression of AHA1-YFPN/AHA1-YFPC, AHA2-YFPN/AHA2-YFPC, phot1-YFPN/phot1-YFPC, and phot2-YFPN/phot2-YFPC were used as positive controls. Scale bar represents 150  $\mu$ m.

**Supplementary Table 1. Putative targets of the selected inhibitors in Arabidopsis.**

| <b>Inhibitor</b> | <b>Mammalian target</b> | <b>Putative targets in Arabidopsis</b> | <b>Identity (%)</b> |
|------------------|-------------------------|----------------------------------------|---------------------|
| Tyrphostin 9     | PDGFRK                  | Raf-like kinase<br>At4g31170           | 39                  |
|                  |                         | Raf-like kinase<br>At2g24360           | 37                  |
|                  |                         | Raf-like kinase<br>At4g35780           | 32                  |
| Sphingosine      | PKC                     | S6 kinase-1<br>At3g08730               | 38                  |
|                  |                         | S6 kinase-2<br>At3g08720               | 41                  |
|                  |                         | Putative protein<br>kinase At1g48490   | 39                  |
| GW5074           | c-Raf                   | Raf-like kinase<br>At4g35780           | 38                  |
|                  |                         | Raf-like kinase<br>At2g17700           | 38                  |
|                  |                         | Raf-like kinase<br>At1g73660           | 37                  |
| BML-265          | EGFRK                   | Raf-like kinase<br>At4g35780           | 32                  |
|                  |                         | Raf-like kinase<br>At4g38470           | 32                  |
|                  |                         | Raf-like kinase<br>At2g17700           | 33                  |

Tyrphostin 9, Sphingosine, GW5074 and BML-265 were screened from the Inhibitor library (Enzo; BML-2832) as inhibitors that suppress effectively the blue light-dependent H<sup>+</sup>-ATPase phosphorylation and stomatal opening. Detection of the guard cell H<sup>+</sup>-ATPase was performed by the immunohistochemical method (Fig. 1a). The targets of the inhibitors are known in the mammalian cells. Putative targets in Arabidopsis were assumed by BLAST search (<http://blast.ncbi.nlm.nih.gov/Blast.cgi>) using the full-length amino acid sequences, and three proteins with high similarity are shown in the list.

**Supplementary Table 2. Primers used in RT-PCR and BiFC assay.**

| Gene                                             | Experiments | Primer sequence                                                                              |
|--------------------------------------------------|-------------|----------------------------------------------------------------------------------------------|
| At3g58640<br>B1                                  | for RT-PCR  | F: ATGGCGATCAAAGAGGAGAC<br>R: TAGGCCTGAAAAGTAACCAC                                           |
| At4g24480<br>B3                                  | for RT-PCR  | F: TCAGAGTGAATTTAACGAAATGC<br>R: CTATAGTATGGGAGCTGATTTAGTTGG                                 |
| At2g35050<br>B4                                  | for RT-PCR  | F: ATGGATCAAGCAAAGGTTATGAACATG<br>R: TTAAGTGTGGATTTGGTGGTTGACAG                              |
| At3g24715<br>B4                                  | for RT-PCR  | F: ATGTCAGATAGATGGGCTCGAC<br>R: AGGAAATTGGCAATGGGAGAG                                        |
| <i>VIK</i> At1g14000<br>C1                       | for RT-PCR  | F: CAATGGTGATCTGATGGTAG<br>R: TCTGAATCGTTTTGAGATG                                            |
| <i>BHP</i> At4g18950<br>C1                       | for RT-PCR  | F: ATGGAAGAGGATTATCAACAGC<br>R: TCACAAATGTGAACCGGATG                                         |
| At4g35780<br>C2                                  | for RT-PCR  | F: ATGGCGATCAAAGAGGAGAC<br>R: TAGGCCTGAAAAGTAACCAC                                           |
| At5g50180<br>C3                                  | for RT-PCR  | F: AATCTTGCAATGGATTCTTTGACTG<br>R: CAAGGTTAATAACATTGATTGAAGCAG                               |
| At2g24360<br>C6                                  | for RT-PCR  | F: AGTGAATCTTAGATTGGAAGATGC<br>R: TTCTCGCTGTCGTCATTATCTCTG                                   |
| At3g01490<br>C7                                  | for RT-PCR  | F: AAATGAAGGAGAAGGCGGAGAGTG<br>R: ATCCCAAAGCTATACACATCGCAC                                   |
| At5g50000<br>C7                                  | for RT-PCR  | F: ATGAAAGAAGGAAAGGATGGGTTTG<br>R: TTAAGGACCACGTTTCTTCGG                                     |
| <b>BHP</b><br>BHP-YFP <sup>N</sup>               | for BiFC    | F: GAGGGTACCGCTCCCATGGAAGAGGATTATCAACAGC<br>R: CTTTTGCTCCATCCCCAAATGTGAACCGGATGATG           |
| <b>BLUS1</b><br>BLUS1-YFP <sup>C</sup>           | for BiFC    | F: GAGGGTACCGCTCCCATGGCTCGGAACAAGCTCGAGTTC<br>R: GTATGGGTACATCCCACCCAAAACACTATCTTTATCAGC     |
| <b>PHOT1</b><br>PHOT1-YFP <sup>N</sup>           | for BiFC    | F: GAGGGTACCGCTCCCATGGAACCAACAGAAAAACCATCG<br>R: CTTTTGCTCCATCCCCAAAACATTTGTTTGCAGATCTTCTAGC |
| PHOT1-YFP <sup>C</sup>                           | for BiFC    | F: GAGGGTACCGCTCCCATGGAACCAACAGAAAAACCATCG<br>R: GTATGGGTACATCCCAAAACATTTGTTTGCAGATCTTCTAGC  |
| <b>PHOT2</b><br>PHOT2-YFP <sup>N</sup>           | for BiFC    | F: GAGGGTACCGCTCCCATGGAGAGGCCAAGAGCCCCT<br>R: CTTTTGCTCCATCCCAGAGGTCATGTCCAAGTCCG            |
| PHOT2-YFP <sup>C</sup>                           | for BiFC    | F: GAGGGTACCGCTCCCATGGAGAGGCCAAGAGCCCCT<br>R: GTATGGGTACATCCCAGAGGTCATGTCCAAGTCCG            |
| <b>AHA1</b><br>AHA1-YFP <sup>N</sup>             | for BiFC    | F: GAGGGTACCGCTCCCATGTCAGGTCTCGAAGATATCAAG<br>R: CTTTTGCTCCATCCCACAGTGTAGTGATGTCCTGC         |
| AHA1-YFP <sup>C</sup>                            | for BiFC    | F: GAGGGTACCGCTCCCATGTCAGGTCTCGAAGATATCAAG<br>R: GTATGGGTACATCCCACAGTGTAGTGATGTCCTGC         |
| <b>AHA2</b><br>AHA2-YFP <sup>N</sup>             | for BiFC    | F: GAGGGTACCGCTCCCATGTCGAGTCTCGAAGATATCAAG<br>R: CTTTTGCTCCATCCCACAGTGTAGTGACTGGGAGTTTC      |
| AHA2-YFP <sup>C</sup>                            | for BiFC    | F: GAGGGTACCGCTCCCATGTCGAGTCTCGAAGATATCAAG<br>R: GTATGGGTACATCCCACAGTGTAGTGACTGGGAGTTTC      |
| <b>PP1</b><br>TOPP4-YFP <sup>C</sup>             | for BiFC    | F: GAGGGTACCGCTCCCATGGCGACGACGACGACG<br>R: GTATGGGTACATCCCAATCTTTGTGGACATCATGAACCTG          |
| <b>INHIBITOR3</b><br>INHIBITOR3-YFP <sup>N</sup> | for BiFC    | F: GAGGGTACCGCTCCCATGAGCACAGCAACAAGGCCTTCC<br>R: CTTTTGCTCCATCCCGTCAACGGCTTTAGAATCATTAGAAG   |

## Supplementary References

1. Ichimura, K. *et al.* Mitogen-activated protein kinase cascades in plants: a new nomenclature. *Trends Plant Sci* **7**, 301-308 (2002).
2. Kanczewska, J. *et al.* Activation of the plant plasma membrane H<sup>+</sup>-ATPase by phosphorylation and binding of 14-3-3 proteins converts a dimer into a hexamer. *Proc Natl Acad Sci USA* **102**, 11675-11680 (2005).
3. Katsura, H., Zikihara, K., Okajima, K., Yoshihara, S. & Tokutomi, S. Oligomeric structure of LOV domains in Arabidopsis phototropin. *FEBS Lett* **583**, 526-530 (2009).
